# Supplementary material
Source: publisher figshare collection journal article supplement (https://acs.figshare.com/ndownloader/files/5341693)
Supplement: Supplementary file 1 [file 5341693]

  
data_Complex7 
  
_audit_creation_method            SHELXL-97 
_chemical_name_systematic 
; 
 ? 
; 
_chemical_name_common             ? 
_chemical_melting_point           ? 
_chemical_formula_moiety          ? 
_chemical_formula_sum 
 'C42 H36 Br2 N4 Ni' 
_chemical_formula_weight          815.28 
  
loop_ 
 _atom_type_symbol 
 _atom_type_description 
 _atom_type_scat_dispersion_real 
 _atom_type_scat_dispersion_imag 
 _atom_type_scat_source 
 'C'  'C'   0.0033   0.0016 
 'International Tables Vol C Tables 4.2.6.8 and 6.1.1.4' 
 'H'  'H'   0.0000   0.0000 
 'International Tables Vol C Tables 4.2.6.8 and 6.1.1.4' 
 'N'  'N'   0.0061   0.0033 
 'International Tables Vol C Tables 4.2.6.8 and 6.1.1.4' 
 'Ni'  'Ni'   0.3393   1.1124 
 'International Tables Vol C Tables 4.2.6.8 and 6.1.1.4' 
 'Br'  'Br'  -0.2901   2.4595 
 'International Tables Vol C Tables 4.2.6.8 and 6.1.1.4' 
  
_symmetry_cell_setting            Monoclinic 
_symmetry_space_group_name_H-M    P2(1)/c 
  
loop_ 
 _symmetry_equiv_pos_as_xyz 
 'x, y, z' 
 '-x, y+1/2, -z+1/2' 
 '-x, -y, -z' 
 'x, -y-1/2, z-1/2' 
  
_cell_length_a                    5.8346(4) 
_cell_length_b                    18.1330(11) 
_cell_length_c                    16.3959(10) 
_cell_angle_alpha                 90.00 
_cell_angle_beta                  91.495(2) 
_cell_angle_gamma                 90.00 
_cell_volume                      1734.08(19) 
_cell_formula_units_Z             2 
_cell_measurement_temperature     223(2) 
_cell_measurement_reflns_used     3499 
_cell_measurement_theta_min       2.49 
_cell_measurement_theta_max       26.81 
  
_exptl_crystal_description        'LONG ROD' 
_exptl_crystal_colour             ORANGE 
_exptl_crystal_size_max           0.56 
_exptl_crystal_size_mid           0.14 
_exptl_crystal_size_min           0.12 
_exptl_crystal_density_meas       0 
_exptl_crystal_density_diffrn     1.561 
_exptl_crystal_density_method     'not measured' 
_exptl_crystal_F_000              828 
_exptl_absorpt_coefficient_mu     2.901 
_exptl_absorpt_correction_type    'Sadabs, (Sheldiick 2001' 
_exptl_absorpt_correction_T_min   0.2934 
_exptl_absorpt_correction_T_max   0.7222 
_exptl_absorpt_process_details    ? 
  
_exptl_special_details 
; 
 ? 
; 
  
_diffrn_ambient_temperature       223(2) 
_diffrn_radiation_wavelength      0.71073 
_diffrn_radiation_type            MoK\a 
_diffrn_radiation_source          'fine-focus sealed tube' 
_diffrn_radiation_monochromator   graphite 
_diffrn_measurement_device_type   'CCD area detector' 
_diffrn_measurement_method        'phi and omega scans' 
_diffrn_detector_area_resol_mean  ? 
_diffrn_standards_number          ? 
_diffrn_standards_interval_count  ? 
_diffrn_standards_interval_time   ? 
_diffrn_standards_decay_%         ? 
_diffrn_reflns_number             12006 
_diffrn_reflns_av_R_equivalents   0.0326 
_diffrn_reflns_av_sigmaI/netI     0.0390 
_diffrn_reflns_limit_h_min        -7 
_diffrn_reflns_limit_h_max        7 
_diffrn_reflns_limit_k_min        -23 
_diffrn_reflns_limit_k_max        22 
_diffrn_reflns_limit_l_min        -21 
_diffrn_reflns_limit_l_max        19 
_diffrn_reflns_theta_min          1.67 
_diffrn_reflns_theta_max          27.50 
_reflns_number_total              3987 
_reflns_number_gt                 3293 
_reflns_threshold_expression      >2sigma(I) 
  
_computing_data_collection        'Bruker SMART' 
_computing_cell_refinement        'Bruker SMART' 
_computing_data_reduction         'Bruker SAINT' 
_computing_structure_solution     'SHELXS-97 (Sheldrick, 1990)' 
_computing_structure_refinement   'SHELXL-97 (Sheldrick, 1997)' 
_computing_molecular_graphics     'Bruker SHELXTL' 
_computing_publication_material   'Bruker SHELXTL' 
  
_refine_special_details 
; 
 Refinement of F^2^ against ALL reflections.  The weighted R-factor wR and 
 goodness of fit S are based on F^2^, conventional R-factors R are based 
 on F, with F set to zero for negative F^2^. The threshold expression of 
 F^2^ > 2sigma(F^2^) is used only for calculating R-factors(gt) etc. and is 
 not relevant to the choice of reflections for refinement.  R-factors based 
 on F^2^ are statistically about twice as large as those based on F, and R- 
 factors based on ALL data will be even larger. 
; 
  
_refine_ls_structure_factor_coef  Fsqd 
_refine_ls_matrix_type            full 
_refine_ls_weighting_scheme       calc 
_refine_ls_weighting_details 
 'calc w=1/[\s^2^(Fo^2^)+(0.0708P)^2^+0.0000P] where P=(Fo^2^+2Fc^2^)/3' 
_atom_sites_solution_primary      direct 
_atom_sites_solution_secondary    difmap 
_atom_sites_solution_hydrogens    geom 
_refine_ls_hydrogen_treatment     mixed 
_refine_ls_extinction_method      none 
_refine_ls_extinction_coef        ? 
_refine_ls_number_reflns          3987 
_refine_ls_number_parameters      223 
_refine_ls_number_restraints      0 
_refine_ls_R_factor_all           0.0511 
_refine_ls_R_factor_gt            0.0408 
_refine_ls_wR_factor_ref          0.1108 
_refine_ls_wR_factor_gt           0.1054 
_refine_ls_goodness_of_fit_ref    1.045 
_refine_ls_restrained_S_all       1.045 
_refine_ls_shift/su_max           0.001 
_refine_ls_shift/su_mean          0.000 
  
loop_ 
 _atom_site_label 
 _atom_site_type_symbol 
 _atom_site_fract_x 
 _atom_site_fract_y 
 _atom_site_fract_z 
 _atom_site_U_iso_or_equiv 
 _atom_site_adp_type 
 _atom_site_occupancy 
 _atom_site_symmetry_multiplicity 
 _atom_site_calc_flag 
 _atom_site_refinement_flags 
 _atom_site_disorder_assembly 
 _atom_site_disorder_group 
Ni1 Ni 0.5000 0.5000 0.5000 0.02209(13) Uani 1 2 d S . . 
Br1 Br 0.67937(5) 0.572216(15) 0.405378(16) 0.03202(12) Uani 1 1 d . . . 
N1 N 0.6720(4) 0.59189(12) 0.63308(13) 0.0243(5) Uani 1 1 d . . . 
N2 N 0.3784(4) 0.64298(11) 0.57339(13) 0.0234(4) Uani 1 1 d . . . 
C1 C 0.5108(5) 0.58125(14) 0.57390(15) 0.0230(5) Uani 1 1 d . . . 
C2 C 0.6496(5) 0.66139(14) 0.66894(15) 0.0254(6) Uani 1 1 d . . . 
C3 C 0.7802(5) 0.69744(16) 0.72782(17) 0.0331(6) Uani 1 1 d . . . 
H3 H 0.9115 0.6755 0.7518 0.040 Uiso 1 1 calc R . . 
C4 C 0.7095(6) 0.76720(17) 0.75012(18) 0.0408(7) Uani 1 1 d . . . 
H4 H 0.7950 0.7936 0.7898 0.049 Uiso 1 1 calc R . . 
C5 C 0.5133(6) 0.79903(16) 0.71467(19) 0.0413(8) Uani 1 1 d . . . 
H5 H 0.4679 0.8462 0.7317 0.050 Uiso 1 1 calc R . . 
C6 C 0.3834(5) 0.76287(15) 0.65486(17) 0.0333(6) Uani 1 1 d . . . 
H6 H 0.2511 0.7844 0.6312 0.040 Uiso 1 1 calc R . . 
C7 C 0.4577(4) 0.69346(14) 0.63166(15) 0.0245(5) Uani 1 1 d . . . 
C8 C 0.8388(5) 0.53688(15) 0.65993(16) 0.0279(6) Uani 1 1 d . . . 
H8A H 0.9923 0.5587 0.6585 0.033 Uiso 1 1 calc R . . 
H8B H 0.8341 0.4957 0.6213 0.033 Uiso 1 1 calc R . . 
C9 C 0.8009(5) 0.50721(13) 0.74472(16) 0.0260(6) Uani 1 1 d . . . 
C10 C 0.9702(5) 0.46401(15) 0.78177(18) 0.0315(6) Uani 1 1 d . . . 
H10 H 1.1044 0.4535 0.7535 0.038 Uiso 1 1 calc R . . 
C11 C 0.9452(6) 0.43629(16) 0.85893(19) 0.0365(7) Uani 1 1 d . . . 
H11 H 1.0624 0.4074 0.8831 0.044 Uiso 1 1 calc R . . 
C12 C 0.7476(6) 0.45075(18) 0.90130(18) 0.0382(7) Uani 1 1 d . . . 
H12 H 0.7299 0.4318 0.9541 0.046 Uiso 1 1 calc R . . 
C13 C 0.5778(5) 0.49316(16) 0.86521(19) 0.0354(7) Uani 1 1 d . . . 
H13 H 0.4439 0.5035 0.8937 0.042 Uiso 1 1 calc R . . 
C14 C 0.6027(5) 0.52067(15) 0.78723(17) 0.0308(6) Uani 1 1 d . . . 
H14 H 0.4841 0.5488 0.7628 0.037 Uiso 1 1 calc R . . 
C15 C 0.1711(5) 0.65027(15) 0.52125(18) 0.0304(6) Uani 1 1 d . . . 
H15A H 0.0364 0.6422 0.5546 0.036 Uiso 1 1 calc R . . 
H15B H 0.1722 0.6116 0.4795 0.036 Uiso 1 1 calc R . . 
C16 C 0.1480(4) 0.72454(14) 0.47945(16) 0.0260(6) Uani 1 1 d . . . 
C17 C -0.0482(5) 0.76604(17) 0.48958(18) 0.0342(6) Uani 1 1 d . . . 
H17 H -0.1648 0.7484 0.5230 0.041 Uiso 1 1 calc R . . 
C18 C -0.0736(6) 0.83377(17) 0.4505(2) 0.0398(7) Uani 1 1 d . . . 
H18 H -0.2069 0.8619 0.4576 0.048 Uiso 1 1 calc R . . 
C19 C 0.0962(6) 0.85947(16) 0.40164(19) 0.0411(8) Uani 1 1 d . . . 
H19 H 0.0801 0.9054 0.3756 0.049 Uiso 1 1 calc R . . 
C20 C 0.2896(6) 0.81796(18) 0.39077(19) 0.0424(8) Uani 1 1 d . . . 
H20 H 0.4050 0.8356 0.3569 0.051 Uiso 1 1 calc R . . 
C21 C 0.3167(5) 0.75053(17) 0.42906(17) 0.0340(6) Uani 1 1 d . . . 
H21 H 0.4494 0.7224 0.4209 0.041 Uiso 1 1 calc R . . 
  
loop_ 
 _atom_site_aniso_label 
 _atom_site_aniso_U_11 
 _atom_site_aniso_U_22 
 _atom_site_aniso_U_33 
 _atom_site_aniso_U_23 
 _atom_site_aniso_U_13 
 _atom_site_aniso_U_12 
Ni1 0.0300(3) 0.0156(2) 0.0204(2) -0.00017(17) -0.00366(18) 0.00285(18) 
Br1 0.04097(19) 0.02540(17) 0.02986(18) 0.00243(10) 0.00440(12) -0.00042(11) 
N1 0.0305(12) 0.0191(10) 0.0230(11) 0.0021(8) -0.0048(9) 0.0047(9) 
N2 0.0279(11) 0.0165(10) 0.0254(11) 0.0014(8) -0.0041(8) 0.0024(9) 
C1 0.0274(13) 0.0202(12) 0.0212(12) 0.0043(10) -0.0025(10) 0.0023(10) 
C2 0.0339(14) 0.0199(12) 0.0223(13) 0.0016(10) -0.0007(11) 0.0032(11) 
C3 0.0409(16) 0.0301(15) 0.0279(14) 0.0008(11) -0.0085(12) -0.0004(13) 
C4 0.062(2) 0.0299(15) 0.0296(15) -0.0064(12) -0.0123(14) -0.0059(15) 
C5 0.064(2) 0.0209(14) 0.0388(17) -0.0064(12) -0.0018(15) 0.0045(14) 
C6 0.0421(16) 0.0241(13) 0.0334(15) -0.0014(12) -0.0033(12) 0.0095(13) 
C7 0.0316(14) 0.0193(12) 0.0224(13) 0.0007(10) 0.0004(10) -0.0017(11) 
C8 0.0306(14) 0.0277(14) 0.0250(13) 0.0001(11) -0.0061(11) 0.0100(11) 
C9 0.0354(15) 0.0163(12) 0.0259(13) -0.0016(10) -0.0079(11) -0.0004(11) 
C10 0.0347(15) 0.0254(14) 0.0339(15) 0.0003(11) -0.0063(12) 0.0029(12) 
C11 0.0416(17) 0.0302(15) 0.0371(16) 0.0102(12) -0.0114(13) 0.0009(13) 
C12 0.0545(19) 0.0301(15) 0.0298(16) 0.0063(12) -0.0037(13) -0.0038(14) 
C13 0.0399(16) 0.0314(15) 0.0349(16) 0.0022(12) 0.0027(13) -0.0006(13) 
C14 0.0362(15) 0.0256(14) 0.0304(14) 0.0029(11) -0.0053(12) 0.0030(12) 
C15 0.0294(14) 0.0229(14) 0.0385(15) 0.0065(11) -0.0070(11) 0.0020(11) 
C16 0.0293(13) 0.0199(13) 0.0284(13) 0.0007(10) -0.0079(11) 0.0008(11) 
C17 0.0301(14) 0.0333(16) 0.0387(16) 0.0016(12) -0.0063(12) 0.0035(12) 
C18 0.0406(17) 0.0291(15) 0.0487(19) -0.0049(14) -0.0173(14) 0.0114(14) 
C19 0.063(2) 0.0187(14) 0.0402(17) 0.0058(12) -0.0263(15) -0.0014(14) 
C20 0.0503(19) 0.0393(18) 0.0376(17) 0.0103(14) -0.0013(14) -0.0088(16) 
C21 0.0345(15) 0.0320(15) 0.0356(16) 0.0035(12) -0.0012(12) 0.0033(13) 
  
_geom_special_details 
; 
 All esds (except the esd in the dihedral angle between two l.s. planes) 
 are estimated using the full covariance matrix.  The cell esds are taken 
 into account individually in the estimation of esds in distances, angles 
 and torsion angles; correlations between esds in cell parameters are only 
 used when they are defined by crystal symmetry.  An approximate (isotropic) 
 treatment of cell esds is used for estimating esds involving l.s. planes. 
; 
  
loop_ 
 _geom_bond_atom_site_label_1 
 _geom_bond_atom_site_label_2 
 _geom_bond_distance 
 _geom_bond_site_symmetry_2 
 _geom_bond_publ_flag 
Ni1 C1 1.908(3) 3_666 ? 
Ni1 C1 1.908(3) . ? 
Ni1 Br1 2.3025(3) 3_666 ? 
Ni1 Br1 2.3025(3) . ? 
N1 C1 1.347(3) . ? 
N1 C2 1.398(3) . ? 
N1 C8 1.454(3) . ? 
N2 C1 1.360(3) . ? 
N2 C7 1.393(3) . ? 
N2 C15 1.469(3) . ? 
C2 C3 1.379(4) . ? 
C2 C7 1.389(4) . ? 
C3 C4 1.383(4) . ? 
C4 C5 1.395(5) . ? 
C5 C6 1.388(4) . ? 
C6 C7 1.388(4) . ? 
C8 C9 1.512(4) . ? 
C9 C14 1.387(4) . ? 
C9 C10 1.388(4) . ? 
C10 C11 1.372(4) . ? 
C11 C12 1.386(5) . ? 
C12 C13 1.376(4) . ? 
C13 C14 1.384(4) . ? 
C15 C16 1.516(3) . ? 
C16 C17 1.383(4) . ? 
C16 C21 1.384(4) . ? 
C17 C18 1.391(4) . ? 
C18 C19 1.372(5) . ? 
C19 C20 1.372(5) . ? 
C20 C21 1.382(4) . ? 
  
loop_ 
 _geom_angle_atom_site_label_1 
 _geom_angle_atom_site_label_2 
 _geom_angle_atom_site_label_3 
 _geom_angle 
 _geom_angle_site_symmetry_1 
 _geom_angle_site_symmetry_3 
 _geom_angle_publ_flag 
C1 Ni1 C1 180.000(1) 3_666 . ? 
C1 Ni1 Br1 88.89(8) 3_666 3_666 ? 
C1 Ni1 Br1 91.11(8) . 3_666 ? 
C1 Ni1 Br1 91.11(8) 3_666 . ? 
C1 Ni1 Br1 88.89(8) . . ? 
Br1 Ni1 Br1 180.000(11) 3_666 . ? 
C1 N1 C2 111.1(2) . . ? 
C1 N1 C8 124.7(2) . . ? 
C2 N1 C8 124.1(2) . . ? 
C1 N2 C7 111.0(2) . . ? 
C1 N2 C15 122.5(2) . . ? 
C7 N2 C15 126.4(2) . . ? 
N1 C1 N2 105.8(2) . . ? 
N1 C1 Ni1 125.37(19) . . ? 
N2 C1 Ni1 128.49(19) . . ? 
C3 C2 C7 122.3(2) . . ? 
C3 C2 N1 131.7(3) . . ? 
C7 C2 N1 106.0(2) . . ? 
C2 C3 C4 117.1(3) . . ? 
C3 C4 C5 121.0(3) . . ? 
C6 C5 C4 121.7(3) . . ? 
C7 C6 C5 117.0(3) . . ? 
C6 C7 C2 120.9(2) . . ? 
C6 C7 N2 133.1(2) . . ? 
C2 C7 N2 106.0(2) . . ? 
N1 C8 C9 114.2(2) . . ? 
C14 C9 C10 118.2(3) . . ? 
C14 C9 C8 122.9(2) . . ? 
C10 C9 C8 118.9(2) . . ? 
C11 C10 C9 121.2(3) . . ? 
C10 C11 C12 120.1(3) . . ? 
C13 C12 C11 119.3(3) . . ? 
C12 C13 C14 120.5(3) . . ? 
C13 C14 C9 120.7(3) . . ? 
N2 C15 C16 113.9(2) . . ? 
C17 C16 C21 119.3(3) . . ? 
C17 C16 C15 119.6(3) . . ? 
C21 C16 C15 121.1(2) . . ? 
C16 C17 C18 120.2(3) . . ? 
C19 C18 C17 119.9(3) . . ? 
C20 C19 C18 119.9(3) . . ? 
C19 C20 C21 120.7(3) . . ? 
C20 C21 C16 119.9(3) . . ? 
  
_diffrn_measured_fraction_theta_max    0.998 
_diffrn_reflns_theta_full              27.50 
_diffrn_measured_fraction_theta_full   0.998 
_refine_diff_density_max    1.521 
_refine_diff_density_min   -0.282 
_refine_diff_density_rms    0.109 
